# Supplementary material for: FHC, an NS4B-interacting Protein, Enhances Classical Swine Fever Virus Propagation and Acts Positively in Viral Anti-apoptosis
Source: PubMed Central journal article supplement (PMC5974352; doi:10.1038/s41598-018-26777-8), 2018-05-29
Supplement: 41598_2018_26777_MOESM1_ESM.pdf [file 41598_2018_26777_MOESM1_ESM.pdf]

**FHC, an NS4B-interacting Protein, Enhances Classical Swine Fever Virus Propagation and Acts**

**Positively in Viral Anti-apoptosis**

Gui Qian<sup>1</sup>, Huifang Lv<sup>1</sup>, Jihui Lin<sup>1</sup>, Xiaomeng Li<sup>1</sup>, Qizhuang Lv<sup>2</sup>, Tao Wang<sup>1</sup>, Jing Zhang<sup>1</sup>, Wang

Dong<sup>1</sup>, Kangkang Guo<sup>1</sup>, Yanming Zhang<sup>1,\*</sup>

<sup>1</sup> College of Veterinary Medicine, Northwest A&F University, No. 22 Xinong Road, Yangling, 712100, Shaanxi, China.

<sup>2</sup> College of Biology & Pharmacy, Yulin Normal University, No. 1303 Jiaoyu East Road, Yulin, 537000, Guangxi, China.

\*Corresponding author

Yanming Zhang. Tel.: +86 2987092040

Fax: +86 2987091032

E-mail address: zhangym@nwsuaf.edu.cn

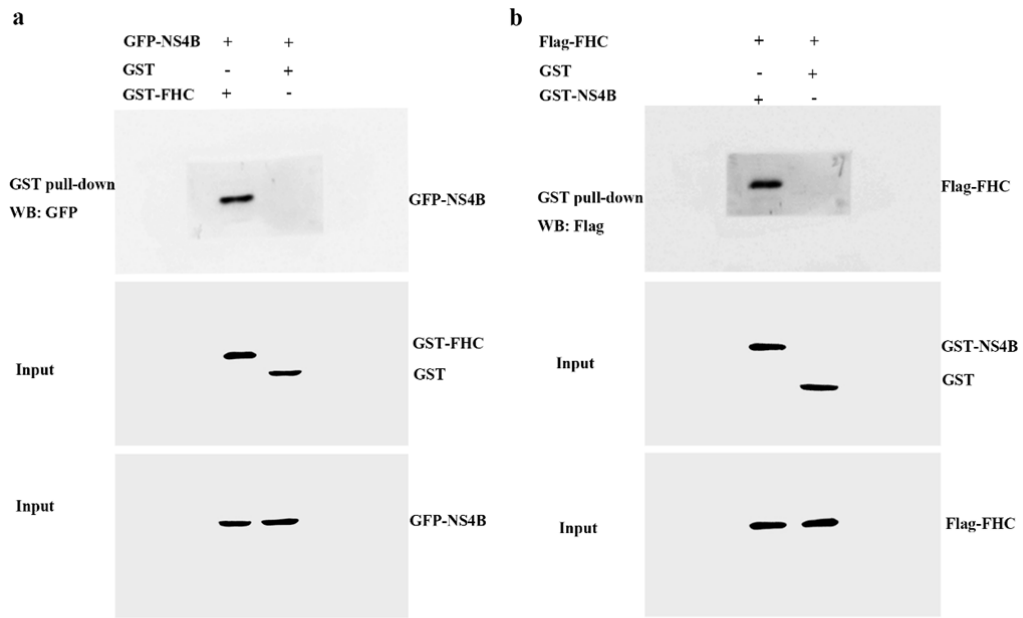

Figure S1 Full-length blots for Figure. 1a and b.

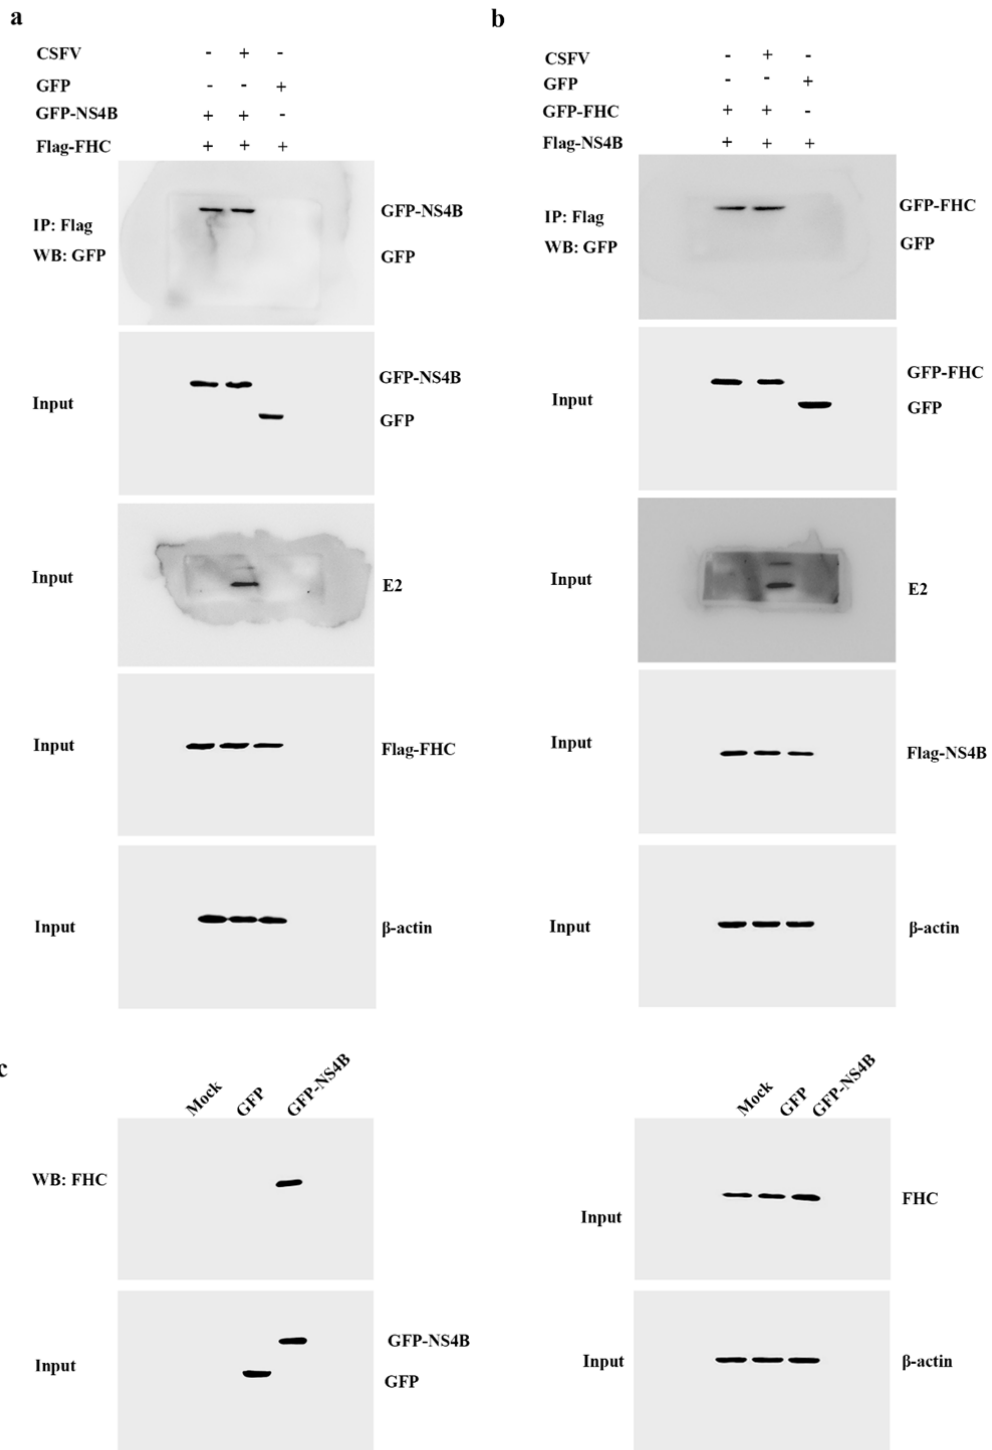

Figure. S2 Full-length blots for Figure. 1c, d and e.

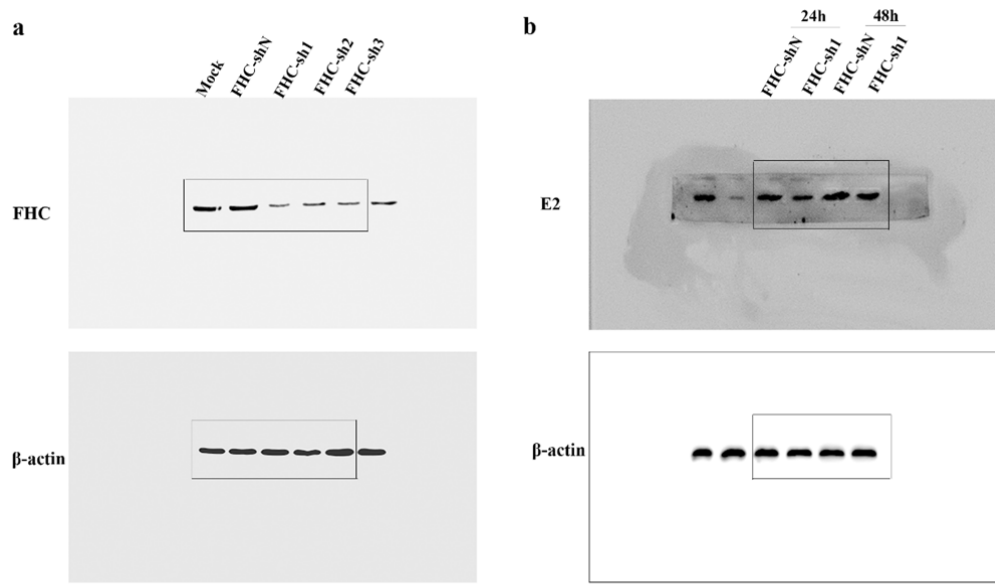

Figure S3 Full-length blots for Figure. 3d and f.

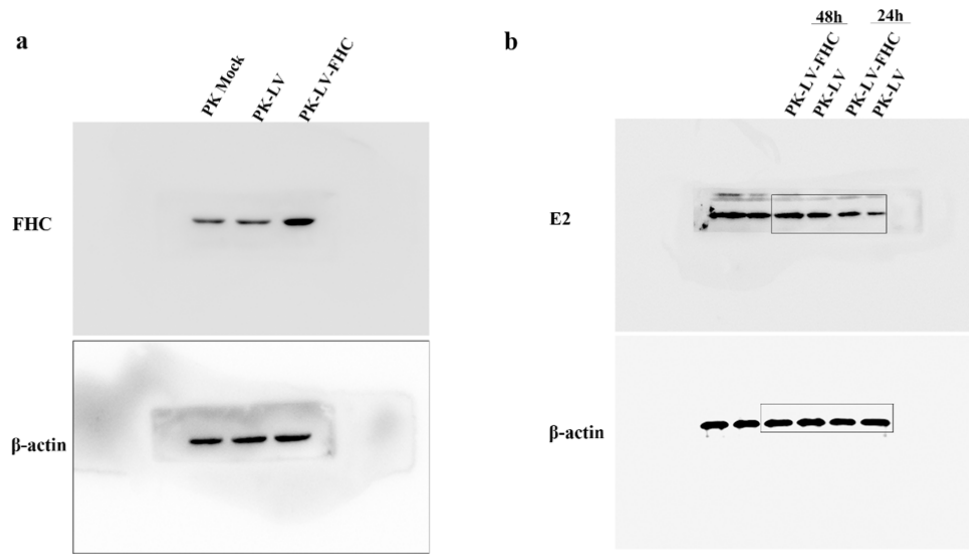

Figure S4 Full-length blots for Figure. 4c and e.

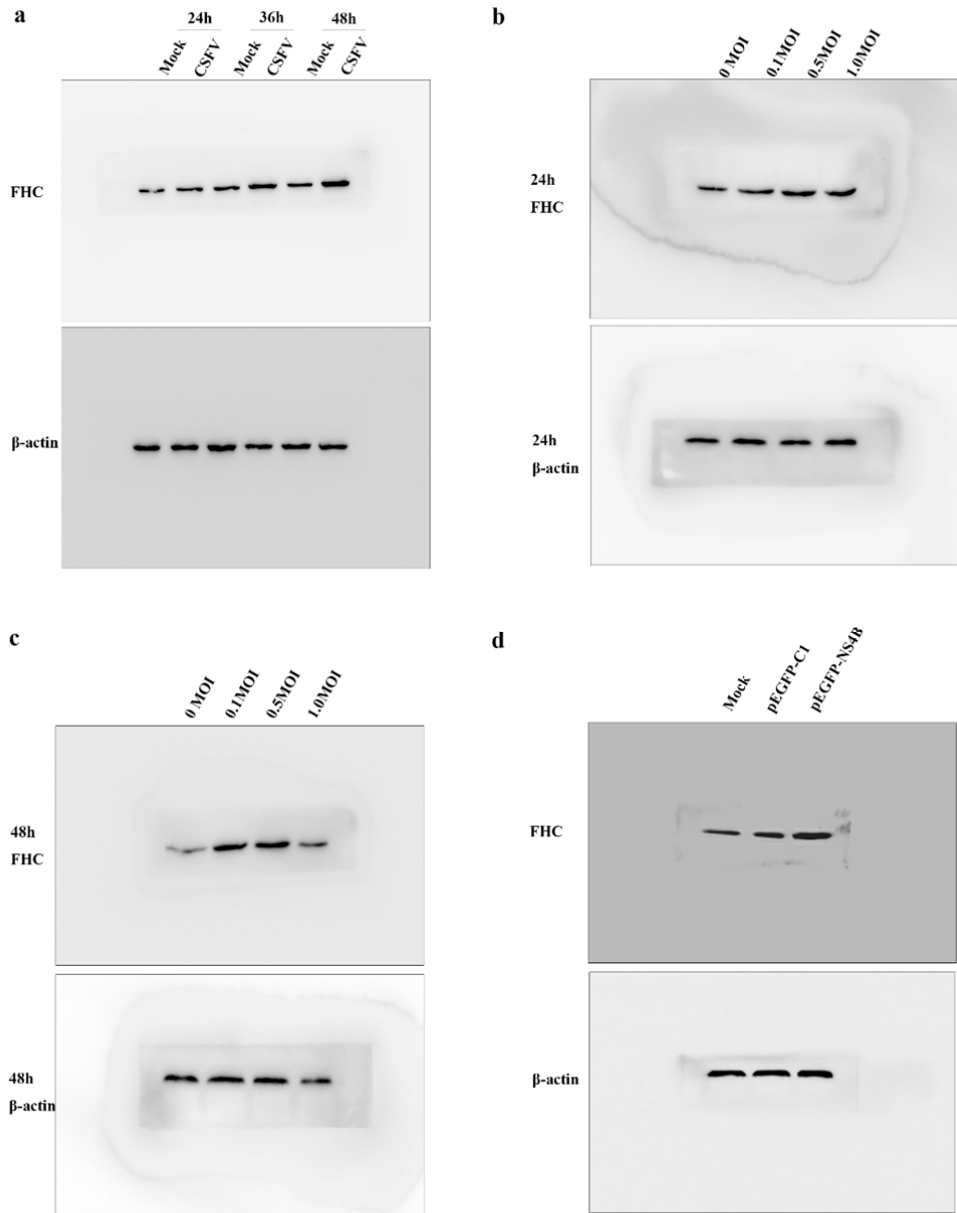

Figure. S5 Full-length blots for Figure. 5b, c, d and f.
